# Supplementary material for: Effects of Isoflavone-Enriched Feed on the Rumen Microbiota in Dairy Cows
Source: PubMed Central journal article supplement (PMC4849651; doi:10.1371/journal.pone.0154642), 2016-04-28
Supplement: pone.0154642.s001.pdf [file pone.0154642.s001.pdf]

**Table S1.** Composition of supplemental mixture.

|                                                                           |   |      |
|---------------------------------------------------------------------------|---|------|
| Wheat                                                                     | % | 27.6 |
| Barley                                                                    | % | 10.0 |
| Maize grain                                                               | % | 15.0 |
| Soybean extraction meal, peeled, toasted                                  | % | 19.0 |
| Rapeseed extraction meal                                                  | % | 11.0 |
| Malt sprouts                                                              | % | 7.6  |
| Schaumann energy                                                          | % | 3.3  |
| Rindamin Gim Spezial                                                      | % | 2.3  |
| SME Bovi Top (microminerals and<br>vitamines mixture)                     | % | 0.5  |
| Sodium bicarbonate (NaHCO <sub>3</sub> )                                  | % | 1.1  |
| Monocalcium phosphate (Ca(H <sub>2</sub> PO <sub>4</sub> ) <sub>2</sub> ) | % | 0.5  |
| Magnezit (MgCO <sub>3</sub> )                                             | % | 0.2  |
| Sodium chloride (NaCl)                                                    | % | 0.3  |
| Limestone (CaCO <sub>3</sub> )                                            | % | 1.6  |
